# Supplementary material for: Novel Genes Associated with Colorectal Cancer Are Revealed by High Resolution Cytogenetic Analysis in a Patient Specific Manner
Source: PLoS One. 2013 Oct 30;8(10):e76251. doi: 10.1371/journal.pone.0076251 (PMC3813709; doi:10.1371/journal.pone.0076251)
Supplement: Table S1 — Target analysis of miRNA affected by LOH/UPD events. (XLSX) [file pone.0076251.s004.xlsx]

## Sheet: Pathway Ranking Summary (Homo S
Table S1: Target analysis of miRNA affected by LOH/UPD events
CATEGORY	TERM	TERM_ID	URL	TOTAL_GENES_OF_THE_TERM	UNION_TARGETS_IN_THE_TERM	MIRS_IN_THE_TERM	SCORE
PATHWAY_INTERACTION_DATABASE	EPHB_FORWARD_SIGNALING	200052	http://pid.nci.nih.gov/search/pathway_landing.shtml?what=graphic&jpg=on&pathway_id=200052	36	16	7	0.852
KEGG	PATHWAYS_IN_CANCER	5200	http://www.kegg.jp/kegg-bin/show_pathway?hsa05200+hsa:1021+hsa:1027+hsa:1050+hsa:11211+hsa:1288+hsa:1499+hsa:1857+hsa:1871+hsa:2034+hsa:2247+hsa:2254+hsa:2257+hsa:2308+hsa:26060+hsa:2885+hsa:3082+hsa:3091+hsa:331+hsa:3479+hsa:3480+hsa:356+hsa:3655+hsa:3685+hsa:3845+hsa:3915+hsa:405+hsa:4087+hsa:4233+hsa:4286+hsa:5156+hsa:5295+hsa:5727+hsa:5728+hsa:596+hsa:64399+hsa:6932+hsa:7042+hsa:7187+hsa:7422…	325	47	7	0.708
KEGG	MAPK_SIGNALING_PATHWAY	4010	http://www.kegg.jp/kegg-bin/show_pathway?hsa04010+hsa:10746+hsa:11221+hsa:11261+hsa:1847+hsa:2247+hsa:2254+hsa:2257+hsa:2885+hsa:356+hsa:3845+hsa:4208+hsa:4215+hsa:4763+hsa:4909+hsa:4915+hsa:51347+hsa:5156+hsa:51701+hsa:51776+hsa:5494+hsa:5495+hsa:5534+hsa:5567+hsa:57551+hsa:5908+hsa:5921+hsa:6197+hsa:6416+hsa:6722+hsa:7042+hsa:776+hsa:8911+hsa:8986+hsa:9448+hsa:9693+hsa:998	272	36	7	0.694
KEGG	WNT_SIGNALING_PATHWAY	4310	http://www.kegg.jp/kegg-bin/show_pathway?hsa04310+hsa:10023+hsa:10725+hsa:11211+hsa:11261+hsa:1459+hsa:1499+hsa:166336+hsa:1857+hsa:4087+hsa:4772+hsa:51701+hsa:5534+hsa:5567+hsa:59343+hsa:6093+hsa:6932+hsa:7474+hsa:79718+hsa:815+hsa:818+hsa:8322+hsa:8325+hsa:894	150	23	7	0.691
PATHWAY_INTERACTION_DATABASE	ERBB1_DOWNSTREAM_SIGNALING	200134	http://pid.nci.nih.gov/search/pathway_landing.shtml?what=graphic&jpg=on&pathway_id=200134	106	23	7	0.637
KEGG	REGULATION_OF_ACTIN_CYTOSKELETON	4810	http://www.kegg.jp/kegg-bin/show_pathway?hsa04810+hsa:10092+hsa:10163+hsa:10787+hsa:10788+hsa:1129+hsa:1133+hsa:1445+hsa:1730+hsa:200576+hsa:2247+hsa:2254+hsa:2257+hsa:23396+hsa:28964+hsa:3655+hsa:3672+hsa:3678+hsa:3685+hsa:3690+hsa:3845+hsa:4627+hsa:4628+hsa:4638+hsa:4659+hsa:5063+hsa:5156+hsa:5217+hsa:5295+hsa:5962+hsa:60+hsa:6093+hsa:6548+hsa:8394+hsa:8503+hsa:8976+hsa:9087+hsa:998	213	37	6	0.586
KEGG	AXON_GUIDANCE	4360	http://www.kegg.jp/kegg-bin/show_pathway?hsa04360+hsa:10725+hsa:11261+hsa:1808+hsa:1947+hsa:1948+hsa:1949+hsa:2047+hsa:223117+hsa:3845+hsa:4233+hsa:4772+hsa:5063+hsa:5534+hsa:5921+hsa:5998+hsa:6091+hsa:6092+hsa:6093+hsa:998	129	19	7	0.581
PATHWAY_INTERACTION_DATABASE	REGULATION_OF_RETINOBLASTOMA_PROTEIN	200224	http://pid.nci.nih.gov/search/pathway_landing.shtml?what=graphic&jpg=on&pathway_id=200224	64	13	4	0.579
KEGG	RENAL_CELL_CARCINOMA	5211	http://www.kegg.jp/kegg-bin/show_pathway?hsa05211+hsa:2034+hsa:2549+hsa:2885+hsa:3082+hsa:3091+hsa:3845+hsa:405+hsa:4233+hsa:5063+hsa:5295+hsa:5908+hsa:7042+hsa:7422+hsa:8503+hsa:998	70	15	7	0.55
PATHWAY_INTERACTION_DATABASE	TGF-BETA_RECEPTOR_SIGNALING	200228	http://pid.nci.nih.gov/search/pathway_landing.shtml?what=graphic&jpg=on&pathway_id=200228	55	13	6	0.546
KEGG	FOCAL_ADHESION	4510	http://www.kegg.jp/kegg-bin/show_pathway?hsa04510+hsa:1278+hsa:1288+hsa:1289+hsa:1301+hsa:1499+hsa:23396+hsa:2885+hsa:3082+hsa:331+hsa:3479+hsa:3480+hsa:3655+hsa:3672+hsa:3678+hsa:3685+hsa:3690+hsa:3915+hsa:4233+hsa:4638+hsa:4659+hsa:5063+hsa:5156+hsa:5295+hsa:5728+hsa:5908+hsa:596+hsa:60+hsa:6093+hsa:7422+hsa:8503+hsa:894+hsa:998	199	32	7	0.517
KEGG	PROSTATE_CANCER	5215	http://www.kegg.jp/kegg-bin/show_pathway?hsa05215+hsa:1027+hsa:1385+hsa:1499+hsa:1871+hsa:2308+hsa:2885+hsa:3479+hsa:3480+hsa:3845+hsa:5156+hsa:5295+hsa:5728+hsa:596+hsa:64764+hsa:6932+hsa:8503+hsa:9134+hsa:9586	89	18	6	0.491
PATHWAY_INTERACTION_DATABASE	PDGFR-BETA_SIGNALING_PATHWAY	200150	http://pid.nci.nih.gov/search/pathway_landing.shtml?what=graphic&jpg=on&pathway_id=200150	126	22	7	0.489
KEGG	B_CELL_RECEPTOR_SIGNALING_PATHWAY	4662	http://www.kegg.jp/kegg-bin/show_pathway?hsa04662+hsa:10725+hsa:11261+hsa:118788+hsa:2885+hsa:3845+hsa:4772+hsa:5295+hsa:5534+hsa:8503	75	9	6	0.487
PATHWAY_INTERACTION_DATABASE	IL2_SIGNALING_EVENTS_MEDIATED_BY_STAT5	200185	http://pid.nci.nih.gov/search/pathway_landing.shtml?what=graphic&jpg=on&pathway_id=200185	30	8	6	0.485
PATHWAY_INTERACTION_DATABASE	FGF_SIGNALING_PATHWAY	200221	http://pid.nci.nih.gov/search/pathway_landing.shtml?what=graphic&jpg=on&pathway_id=200221	59	13	5	0.479
KEGG	MELANOMA	5218	http://www.kegg.jp/kegg-bin/show_pathway?hsa05218+hsa:1021+hsa:1871+hsa:2247+hsa:2254+hsa:2257+hsa:3082+hsa:3479+hsa:3480+hsa:3845+hsa:4233+hsa:4286+hsa:5156+hsa:5295+hsa:5728+hsa:8503	71	15	4	0.477
PATHWAY_INTERACTION_DATABASE	SIGNALING_EVENTS_MEDIATED_BY_TCPTP	200078	http://pid.nci.nih.gov/search/pathway_landing.shtml?what=graphic&jpg=on&pathway_id=200078	41	8	5	0.465
KEGG	T_CELL_RECEPTOR_SIGNALING_PATHWAY	4660	http://www.kegg.jp/kegg-bin/show_pathway?hsa04660+hsa:10725+hsa:11261+hsa:2885+hsa:3845+hsa:4772+hsa:5063+hsa:5295+hsa:5534+hsa:8503+hsa:940+hsa:998	108	11	6	0.461
KEGG	ENDOCYTOSIS	4144	http://www.kegg.jp/kegg-bin/show_pathway?hsa04144+hsa:10938+hsa:153+hsa:1601+hsa:2066+hsa:23327+hsa:23396+hsa:2869+hsa:28964+hsa:3480+hsa:382+hsa:4087+hsa:4091+hsa:4092+hsa:4233+hsa:50807+hsa:5156+hsa:57154+hsa:57403+hsa:5868+hsa:60682+hsa:64744+hsa:7042+hsa:7879+hsa:8394+hsa:84440+hsa:9525+hsa:9815+hsa:998	201	28	5	0.444
KEGG	DILATED_CARDIOMYOPATHY	5414	http://www.kegg.jp/kegg-bin/show_pathway?hsa05414+hsa:109+hsa:112+hsa:153+hsa:1605+hsa:1756+hsa:3479+hsa:3655+hsa:3672+hsa:3678+hsa:3685+hsa:3690+hsa:488+hsa:5567+hsa:60+hsa:6262+hsa:70+hsa:7042+hsa:7168+hsa:7273+hsa:776	90	20	6	0.443
PATHWAY_INTERACTION_DATABASE	REGULATION_OF_NUCLEAR_SMAD2_3_SIGNALING	200003	http://pid.nci.nih.gov/search/pathway_landing.shtml?what=graphic&jpg=on&pathway_id=200003	82	15	6	0.44
PATHWAY_INTERACTION_DATABASE	SIGNALING_EVENTS_MEDIATED_BY_HEPATOCYTE_GROWTH_FACTOR_RECEPTOR_(C-MET)	200041	http://pid.nci.nih.gov/search/pathway_landing.shtml?what=graphic&jpg=on&pathway_id=200041	77	15	5	0.433
KEGG	VEGF_SIGNALING_PATHWAY	4370	http://www.kegg.jp/kegg-bin/show_pathway?hsa04370+hsa:10725+hsa:11261+hsa:3845+hsa:4772+hsa:5295+hsa:5534+hsa:7422+hsa:8503+hsa:998	76	9	6	0.429
KEGG	CALCIUM_SIGNALING_PATHWAY	4020	http://www.kegg.jp/kegg-bin/show_pathway?hsa04020+hsa:109+hsa:11261+hsa:1129+hsa:1133+hsa:153+hsa:1910+hsa:2066+hsa:2911+hsa:292+hsa:3358+hsa:3360+hsa:3708+hsa:4638+hsa:488+hsa:492+hsa:5156+hsa:5534+hsa:5567+hsa:5733+hsa:6262+hsa:7417+hsa:776+hsa:815+hsa:818+hsa:8911	177	25	6	0.429
KEGG	HYPERTROPHIC_CARDIOMYOPATHY_(HCM)	5410	http://www.kegg.jp/kegg-bin/show_pathway?hsa05410+hsa:1605+hsa:1756+hsa:1906+hsa:3479+hsa:3655+hsa:3672+hsa:3678+hsa:3685+hsa:3690+hsa:488+hsa:5565+hsa:5571+hsa:60+hsa:6262+hsa:70+hsa:7042+hsa:7168+hsa:7273+hsa:776	87	19	6	0.428
PATHWAY_INTERACTION_DATABASE	AP-1_TRANSCRIPTION_FACTOR_NETWORK	200138	http://pid.nci.nih.gov/search/pathway_landing.shtml?what=graphic&jpg=on&pathway_id=200138	69	18	5	0.425
KEGG	GLIOMA	5214	http://www.kegg.jp/kegg-bin/show_pathway?hsa05214+hsa:1021+hsa:1871+hsa:2885+hsa:3479+hsa:3480+hsa:3845+hsa:5156+hsa:5295+hsa:5728+hsa:815+hsa:818+hsa:8503	65	12	5	0.419
KEGG	MELANOGENESIS	4916	http://www.kegg.jp/kegg-bin/show_pathway?hsa04916+hsa:109+hsa:112+hsa:11211+hsa:1385+hsa:1499+hsa:1857+hsa:1906+hsa:1910+hsa:3845+hsa:4286+hsa:5567+hsa:64764+hsa:6932+hsa:7474+hsa:815+hsa:818+hsa:8322+hsa:8325	101	18	6	0.413
KEGG	ADHERENS_JUNCTION	4520	http://www.kegg.jp/kegg-bin/show_pathway?hsa04520+hsa:10163+hsa:1459+hsa:1499+hsa:3480+hsa:4087+hsa:4233+hsa:51701+hsa:5818+hsa:60+hsa:6932+hsa:7082+hsa:8976+hsa:998	73	13	6	0.404
KEGG	ARRHYTHMOGENIC_RIGHT_VENTRICULAR_CARDIOMYOPATHY_(ARVC)	5412	http://www.kegg.jp/kegg-bin/show_pathway?hsa05412+hsa:1000+hsa:1499+hsa:1605+hsa:1756+hsa:1824+hsa:3655+hsa:3672+hsa:3678+hsa:3685+hsa:3690+hsa:488+hsa:60+hsa:6262+hsa:6932+hsa:776	74	15	5	0.401
KEGG	NEUROTROPHIN_SIGNALING_PATHWAY	4722	http://www.kegg.jp/kegg-bin/show_pathway?hsa04722+hsa:10818+hsa:1445+hsa:2549+hsa:25970+hsa:2885+hsa:356+hsa:3845+hsa:4215+hsa:4909+hsa:4915+hsa:5295+hsa:5908+hsa:596+hsa:6197+hsa:815+hsa:818+hsa:8503+hsa:8986+hsa:998	127	19	6	0.398
PATHWAY_INTERACTION_DATABASE	EGF_RECEPTOR_(ERBB1)_SIGNALING_PATHWAY	200101	http://pid.nci.nih.gov/search/pathway_landing.shtml?what=graphic&jpg=on&pathway_id=200101	32	7	4	0.389
KEGG	LONG-TERM_POTENTIATION	4720	http://www.kegg.jp/kegg-bin/show_pathway?hsa04720+hsa:11261+hsa:2890+hsa:2891+hsa:2911+hsa:3708+hsa:3845+hsa:4659+hsa:5534+hsa:5567+hsa:5908+hsa:6197+hsa:815+hsa:818	70	13	6	0.389
KEGG	AMYOTROPHIC_LATERAL_SCLEROSIS_(ALS)	5014	http://www.kegg.jp/kegg-bin/show_pathway?hsa05014+hsa:11261+hsa:2890+hsa:2891+hsa:4741+hsa:4744+hsa:4747+hsa:5534+hsa:5868+hsa:596+hsa:6506	54	10	6	0.382
PATHWAY_INTERACTION_DATABASE	COREGULATION_OF_ANDROGEN_RECEPTOR_ACTIVITY	200049	http://pid.nci.nih.gov/search/pathway_landing.shtml?what=graphic&jpg=on&pathway_id=200049	57	13	5	0.38
PATHWAY_INTERACTION_DATABASE	REGULATION_OF_RAS_FAMILY_ACTIVATION	200213	http://pid.nci.nih.gov/search/pathway_landing.shtml?what=graphic&jpg=on&pathway_id=200213	33	7	4	0.374
KEGG	ERBB_SIGNALING_PATHWAY	4012	http://www.kegg.jp/kegg-bin/show_pathway?hsa04012+hsa:1027+hsa:2066+hsa:2549+hsa:2885+hsa:3084+hsa:3845+hsa:5063+hsa:5295+hsa:6416+hsa:815+hsa:818+hsa:8503	87	12	7	0.373
KEGG	APOPTOSIS	4210	http://www.kegg.jp/kegg-bin/show_pathway?hsa04210+hsa:11261+hsa:331+hsa:356+hsa:5295+hsa:5534+hsa:5567+hsa:5573+hsa:5576+hsa:596+hsa:843+hsa:8503	88	11	5	0.368
PATHWAY_INTERACTION_DATABASE	IL6-MEDIATED_SIGNALING_EVENTS	200147	http://pid.nci.nih.gov/search/pathway_landing.shtml?what=graphic&jpg=on&pathway_id=200147	45	8	4	0.366
PATHWAY_INTERACTION_DATABASE	FOXO_FAMILY_SIGNALING	200108	http://pid.nci.nih.gov/search/pathway_landing.shtml?what=graphic&jpg=on&pathway_id=200108	49	12	5	0.361
PATHWAY_INTERACTION_DATABASE	NEUROTROPHIC_FACTOR-MEDIATED_TRK_RECEPTOR_SIGNALING	200151	http://pid.nci.nih.gov/search/pathway_landing.shtml?what=graphic&jpg=on&pathway_id=200151	61	11	5	0.36
PATHWAY_INTERACTION_DATABASE	STABILIZATION_AND_EXPANSION_OF_THE_E-CADHERIN_ADHERENS_JUNCTION	200183	http://pid.nci.nih.gov/search/pathway_landing.shtml?what=graphic&jpg=on&pathway_id=200183	41	11	5	0.359
PATHWAY_INTERACTION_DATABASE	NOTCH-MEDIATED_HES_HEY_NETWORK	200229	http://pid.nci.nih.gov/search/pathway_landing.shtml?what=graphic&jpg=on&pathway_id=200229	48	9	5	0.357
KEGG	NATURAL_KILLER_CELL_MEDIATED_CYTOTOXICITY	4650	http://www.kegg.jp/kegg-bin/show_pathway?hsa04650+hsa:10725+hsa:11261+hsa:2885+hsa:3455+hsa:356+hsa:3845+hsa:4772+hsa:5295+hsa:5534+hsa:8503	140	10	6	0.351
KEGG	GAP_JUNCTION	4540	http://www.kegg.jp/kegg-bin/show_pathway?hsa04540+hsa:10746+hsa:109+hsa:112+hsa:153+hsa:2885+hsa:2911+hsa:3358+hsa:3708+hsa:3845+hsa:5156+hsa:5567+hsa:5592+hsa:7082+hsa:7846	90	14	7	0.349
PATHWAY_INTERACTION_DATABASE	E-CADHERIN_SIGNALING_IN_THE_NASCENT_ADHERENS_JUNCTION	200125	http://pid.nci.nih.gov/search/pathway_landing.shtml?what=graphic&jpg=on&pathway_id=200125	38	11	5	0.349
PATHWAY_INTERACTION_DATABASE	NONCANONICAL_WNT_SIGNALING_PATHWAY	200020	http://pid.nci.nih.gov/search/pathway_landing.shtml?what=graphic&jpg=on&pathway_id=200020	32	7	5	0.346
PATHWAY_INTERACTION_DATABASE	SIGNALING_EVENTS_MEDIATED_BY_HDAC_CLASS_I	200084	http://pid.nci.nih.gov/search/pathway_landing.shtml?what=graphic&jpg=on&pathway_id=200084	67	10	6	0.346
PATHWAY_INTERACTION_DATABASE	RHOA_SIGNALING_PATHWAY	200009	http://pid.nci.nih.gov/search/pathway_landing.shtml?what=graphic&jpg=on&pathway_id=200009	44	12	4	0.345
KEGG	SMALL_CELL_LUNG_CANCER	5222	http://www.kegg.jp/kegg-bin/show_pathway?hsa05222+hsa:1021+hsa:1027+hsa:1288+hsa:1871+hsa:331+hsa:3655+hsa:3685+hsa:3915+hsa:5295+hsa:5728+hsa:596+hsa:7187+hsa:8503+hsa:9134	84	14	4	0.345
PATHWAY_INTERACTION_DATABASE	SIGNALING_EVENTS_MEDIATED_BY_STEM_CELL_FACTOR_RECEPTOR_(C-KIT)	200182	http://pid.nci.nih.gov/search/pathway_landing.shtml?what=graphic&jpg=on&pathway_id=200182	52	8	4	0.343
PATHWAY_INTERACTION_DATABASE	INTEGRINS_IN_ANGIOGENESIS	200129	http://pid.nci.nih.gov/search/pathway_landing.shtml?what=graphic&jpg=on&pathway_id=200129	74	15	4	0.342
PATHWAY_INTERACTION_DATABASE	SIGNALING_EVENTS_MEDIATED_BY_HDAC_CLASS_II	200023	http://pid.nci.nih.gov/search/pathway_landing.shtml?what=graphic&jpg=on&pathway_id=200023	34	7	5	0.342
PATHWAY_INTERACTION_DATABASE	DIRECT_P53_EFFECTORS	200120	http://pid.nci.nih.gov/search/pathway_landing.shtml?what=graphic&jpg=on&pathway_id=200120	137	19	5	0.342
PATHWAY_INTERACTION_DATABASE	NEPHRIN_NEPH1_SIGNALING_IN_THE_KIDNEY_PODOCYTE	200153	http://pid.nci.nih.gov/search/pathway_landing.shtml?what=graphic&jpg=on&pathway_id=200153	31	7	5	0.338
PATHWAY_INTERACTION_DATABASE	VALIDATED_TARGETS_OF_C-MYC_TRANSCRIPTIONAL_REPRESSION	200201	http://pid.nci.nih.gov/search/pathway_landing.shtml?what=graphic&jpg=on&pathway_id=200201	63	12	5	0.337
PATHWAY_INTERACTION_DATABASE	FOXA1_TRANSCRIPTION_FACTOR_NETWORK	200227	http://pid.nci.nih.gov/search/pathway_landing.shtml?what=graphic&jpg=on&pathway_id=200227	44	7	5	0.335
PATHWAY_INTERACTION_DATABASE	INTERNALIZATION_OF_ERBB1	200172	http://pid.nci.nih.gov/search/pathway_landing.shtml?what=graphic&jpg=on&pathway_id=200172	39	7	5	0.335
PATHWAY_INTERACTION_DATABASE	SHP2_SIGNALING	200083	http://pid.nci.nih.gov/search/pathway_landing.shtml?what=graphic&jpg=on&pathway_id=200083	54	9	5	0.329
PATHWAY_INTERACTION_DATABASE	BMP_RECEPTOR_SIGNALING	200145	http://pid.nci.nih.gov/search/pathway_landing.shtml?what=graphic&jpg=on&pathway_id=200145	42	9	4	0.328
PATHWAY_INTERACTION_DATABASE	SIGNALING_MEDIATED_BY_P38-ALPHA_AND_P38-BETA	200181	http://pid.nci.nih.gov/search/pathway_landing.shtml?what=graphic&jpg=on&pathway_id=200181	38	8	4	0.325
PATHWAY_INTERACTION_DATABASE	N-CADHERIN_SIGNALING_EVENTS	200210	http://pid.nci.nih.gov/search/pathway_landing.shtml?what=graphic&jpg=on&pathway_id=200210	36	10	5	0.325
KEGG	OLFACTORY_TRANSDUCTION	4740	http://www.kegg.jp/kegg-bin/show_pathway?hsa04740+hsa:109+hsa:5567+hsa:5592+hsa:815+hsa:818	388	5	4	0.324
KEGG	ECM-RECEPTOR_INTERACTION	4512	http://www.kegg.jp/kegg-bin/show_pathway?hsa04512+hsa:1278+hsa:1288+hsa:1289+hsa:1301+hsa:1605+hsa:3655+hsa:3672+hsa:3678+hsa:3685+hsa:3690+hsa:3915+hsa:51206+hsa:6383+hsa:961+hsa:9899	84	15	4	0.32
KEGG	BASAL_CELL_CARCINOMA	5217	http://www.kegg.jp/kegg-bin/show_pathway?hsa05217+hsa:11211+hsa:1499+hsa:1857+hsa:5727+hsa:64399+hsa:6932+hsa:7474+hsa:8322+hsa:8325	55	9	5	0.309
KEGG	CHRONIC_MYELOID_LEUKEMIA	5220	http://www.kegg.jp/kegg-bin/show_pathway?hsa05220+hsa:1021+hsa:1027+hsa:1871+hsa:2885+hsa:3845+hsa:5295+hsa:7042+hsa:8503	73	8	5	0.309
KEGG	BACTERIAL_INVASION_OF_EPITHELIAL_CELLS	5100	http://www.kegg.jp/kegg-bin/show_pathway?hsa05100+hsa:10092+hsa:10163+hsa:1499+hsa:23607+hsa:2549+hsa:3678+hsa:4233+hsa:5295+hsa:60+hsa:8503+hsa:8976+hsa:998	70	12	6	0.307
PATHWAY_INTERACTION_DATABASE	SIGNALING_EVENTS_MEDIATED_BY_FOCAL_ADHESION_KINASE	200225	http://pid.nci.nih.gov/search/pathway_landing.shtml?what=graphic&jpg=on&pathway_id=200225	58	10	5	0.305
PATHWAY_INTERACTION_DATABASE	CALCIUM_SIGNALING_IN_THE_CD4+_TCR_PATHWAY	200186	http://pid.nci.nih.gov/search/pathway_landing.shtml?what=graphic&jpg=on&pathway_id=200186	32	6	4	0.303
PATHWAY_INTERACTION_DATABASE	TRK_RECEPTOR_SIGNALING_MEDIATED_BY_PI3K_AND_PLC-GAMMA	200215	http://pid.nci.nih.gov/search/pathway_landing.shtml?what=graphic&jpg=on&pathway_id=200215	34	6	4	0.303
PATHWAY_INTERACTION_DATABASE	SIGNALING_EVENTS_MEDIATED_BY_VEGFR1_AND_VEGFR2	200189	http://pid.nci.nih.gov/search/pathway_landing.shtml?what=graphic&jpg=on&pathway_id=200189	68	9	5	0.298
PATHWAY_INTERACTION_DATABASE	SIGNALING_EVENTS_REGULATED_BY_RET_TYROSINE_KINASE	200070	http://pid.nci.nih.gov/search/pathway_landing.shtml?what=graphic&jpg=on&pathway_id=200070	38	6	4	0.298
KEGG	INSULIN_SIGNALING_PATHWAY	4910	http://www.kegg.jp/kegg-bin/show_pathway?hsa04910+hsa:2308+hsa:2885+hsa:3845+hsa:5295+hsa:5507+hsa:5565+hsa:5567+hsa:5571+hsa:5573+hsa:5576+hsa:7248+hsa:8503+hsa:8835	137	13	5	0.293
KEGG	ALDOSTERONE-REGULATED_SODIUM_REABSORPTION	4960	http://www.kegg.jp/kegg-bin/show_pathway?hsa04960+hsa:23327+hsa:3479+hsa:3845+hsa:4306+hsa:478+hsa:5295+hsa:6446+hsa:8503	42	8	5	0.289
KEGG	PANCREATIC_CANCER	5212	http://www.kegg.jp/kegg-bin/show_pathway?hsa05212+hsa:1021+hsa:1871+hsa:3845+hsa:4087+hsa:5295+hsa:7042+hsa:7422+hsa:8503+hsa:998	70	9	4	0.287
KEGG	NON-SMALL_CELL_LUNG_CANCER	5223	http://www.kegg.jp/kegg-bin/show_pathway?hsa05223+hsa:1021+hsa:1871+hsa:2885+hsa:3845+hsa:5295+hsa:8503	54	6	5	0.286
KEGG	MTOR_SIGNALING_PATHWAY	4150	http://www.kegg.jp/kegg-bin/show_pathway?hsa04150+hsa:1975+hsa:3091+hsa:3479+hsa:5295+hsa:6197+hsa:7248+hsa:7422+hsa:8503+hsa:92335	52	9	5	0.285
KEGG	CELL_ADHESION_MOLECULES_(CAMS)	4514	http://www.kegg.jp/kegg-bin/show_pathway?hsa04514+hsa:1000+hsa:1462+hsa:22871+hsa:23705+hsa:257194+hsa:3655+hsa:3685+hsa:4684+hsa:4756+hsa:5010+hsa:57863+hsa:5818+hsa:6383+hsa:9369+hsa:940	133	15	6	0.284
KEGG	ENDOMETRIAL_CANCER	5213	http://www.kegg.jp/kegg-bin/show_pathway?hsa05213+hsa:1499+hsa:2885+hsa:3845+hsa:5295+hsa:5728+hsa:6932+hsa:8503	52	7	6	0.281
PATHWAY_INTERACTION_DATABASE	BETA1_INTEGRIN_CELL_SURFACE_INTERACTIONS	200016	http://pid.nci.nih.gov/search/pathway_landing.shtml?what=graphic&jpg=on&pathway_id=200016	65	12	4	0.28
KEGG	OOCYTE_MEIOSIS	4114	http://www.kegg.jp/kegg-bin/show_pathway?hsa04114+hsa:109+hsa:112+hsa:11261+hsa:245711+hsa:3479+hsa:3480+hsa:3708+hsa:5534+hsa:5567+hsa:6197+hsa:815+hsa:818+hsa:9134+hsa:996	112	14	5	0.278
PATHWAY_INTERACTION_DATABASE	ROLE_OF_CALCINEURIN-DEPENDENT_NFAT_SIGNALING_IN_LYMPHOCYTES	200090	http://pid.nci.nih.gov/search/pathway_landing.shtml?what=graphic&jpg=on&pathway_id=200090	55	8	5	0.277
PATHWAY_INTERACTION_DATABASE	EPO_SIGNALING_PATHWAY	200184	http://pid.nci.nih.gov/search/pathway_landing.shtml?what=graphic&jpg=on&pathway_id=200184	34	4	3	0.277
PATHWAY_INTERACTION_DATABASE	HIF-1-ALPHA_TRANSCRIPTION_FACTOR_NETWORK	200203	http://pid.nci.nih.gov/search/pathway_landing.shtml?what=graphic&jpg=on&pathway_id=200203	65	10	5	0.276
PATHWAY_INTERACTION_DATABASE	TRK_RECEPTOR_SIGNALING_MEDIATED_BY_THE_MAPK_PATHWAY	200214	http://pid.nci.nih.gov/search/pathway_landing.shtml?what=graphic&jpg=on&pathway_id=200214	33	7	5	0.275
PATHWAY_INTERACTION_DATABASE	POSTTRANSLATIONAL_REGULATION_OF_ADHERENS_JUNCTION_STABILITY_AND_DISSASSEMBLY	200117	http://pid.nci.nih.gov/search/pathway_landing.shtml?what=graphic&jpg=on&pathway_id=200117	48	11	4	0.275
PATHWAY_INTERACTION_DATABASE	ANGIOPOIETIN_RECEPTOR_TIE2-MEDIATED_SIGNALING	200079	http://pid.nci.nih.gov/search/pathway_landing.shtml?what=graphic&jpg=on&pathway_id=200079	49	7	5	0.274
KEGG	ACUTE_MYELOID_LEUKEMIA	5221	http://www.kegg.jp/kegg-bin/show_pathway?hsa05221+hsa:1050+hsa:2885+hsa:3845+hsa:5295+hsa:6932+hsa:8503+hsa:862	57	7	6	0.27
PATHWAY_INTERACTION_DATABASE	LISSENCEPHALY_GENE_(LIS1)_IN_NEURONAL_MIGRATION_AND_DEVELOPMENT	200133	http://pid.nci.nih.gov/search/pathway_landing.shtml?what=graphic&jpg=on&pathway_id=200133	31	6	3	0.267
KEGG	CELL_CYCLE	4110	http://www.kegg.jp/kegg-bin/show_pathway?hsa04110+hsa:1021+hsa:1027+hsa:10274+hsa:1028+hsa:10735+hsa:1871+hsa:4087+hsa:5885+hsa:5934+hsa:7029+hsa:7042+hsa:8555+hsa:894+hsa:9134+hsa:996	124	15	5	0.266
PATHWAY_INTERACTION_DATABASE	IL12_SIGNALING_MEDIATED_BY_STAT4	200230	http://pid.nci.nih.gov/search/pathway_landing.shtml?what=graphic&jpg=on&pathway_id=200230	33	4	5	0.266
KEGG	TGF-BETA_SIGNALING_PATHWAY	4350	http://www.kegg.jp/kegg-bin/show_pathway?hsa04350+hsa:3625+hsa:4087+hsa:4091+hsa:4092+hsa:57154+hsa:5934+hsa:6093+hsa:659+hsa:6667+hsa:7042	84	10	5	0.265
PATHWAY_INTERACTION_DATABASE	C-MYB_TRANSCRIPTION_FACTOR_NETWORK	200154	http://pid.nci.nih.gov/search/pathway_landing.shtml?what=graphic&jpg=on&pathway_id=200154	81	8	5	0.263
PATHWAY_INTERACTION_DATABASE	BETA3_INTEGRIN_CELL_SURFACE_INTERACTIONS	200043	http://pid.nci.nih.gov/search/pathway_landing.shtml?what=graphic&jpg=on&pathway_id=200043	43	8	3	0.263
PATHWAY_INTERACTION_DATABASE	EPHRIN_B_REVERSE_SIGNALING	200205	http://pid.nci.nih.gov/search/pathway_landing.shtml?what=graphic&jpg=on&pathway_id=200205	30	7	5	0.262
PATHWAY_INTERACTION_DATABASE	IL4-MEDIATED_SIGNALING_EVENTS	200022	http://pid.nci.nih.gov/search/pathway_landing.shtml?what=graphic&jpg=on&pathway_id=200022	64	9	6	0.261
PATHWAY_INTERACTION_DATABASE	NECTIN_ADHESION_PATHWAY	200065	http://pid.nci.nih.gov/search/pathway_landing.shtml?what=graphic&jpg=on&pathway_id=200065	28	8	3	0.261
KEGG	GNRH_SIGNALING_PATHWAY	4912	http://www.kegg.jp/kegg-bin/show_pathway?hsa04912+hsa:10746+hsa:109+hsa:112+hsa:2885+hsa:3708+hsa:3845+hsa:4215+hsa:5567+hsa:6416+hsa:776+hsa:815+hsa:818+hsa:998	101	13	6	0.257
PATHWAY_INTERACTION_DATABASE	REGULATION_OF_TELOMERASE	200086	http://pid.nci.nih.gov/search/pathway_landing.shtml?what=graphic&jpg=on&pathway_id=200086	67	9	5	0.256
PATHWAY_INTERACTION_DATABASE	REGULATION_OF_NUCLEAR_BETA_CATENIN_SIGNALING_AND_TARGET_GENE_TRANSCRIPTION	200177	http://pid.nci.nih.gov/search/pathway_landing.shtml?what=graphic&jpg=on&pathway_id=200177	79	11	6	0.254
KEGG	TIGHT_JUNCTION	4530	http://www.kegg.jp/kegg-bin/show_pathway?hsa04530+hsa:1459+hsa:1499+hsa:3845+hsa:4627+hsa:4628+hsa:5010+hsa:51776+hsa:5522+hsa:5581+hsa:55870+hsa:5728+hsa:60+hsa:7082+hsa:9863+hsa:998	132	15	5	0.253
PATHWAY_INTERACTION_DATABASE	VEGFR1_SPECIFIC_SIGNALS	200178	http://pid.nci.nih.gov/search/pathway_landing.shtml?what=graphic&jpg=on&pathway_id=200178	28	6	4	0.251
PATHWAY_INTERACTION_DATABASE	ERBB4_SIGNALING_EVENTS	200011	http://pid.nci.nih.gov/search/pathway_landing.shtml?what=graphic&jpg=on&pathway_id=200011	35	4	4	0.25
PATHWAY_INTERACTION_DATABASE	REGULATION_OF_ANDROGEN_RECEPTOR_ACTIVITY	200121	http://pid.nci.nih.gov/search/pathway_landing.shtml?what=graphic&jpg=on&pathway_id=200121	52	9	3	0.247
PATHWAY_INTERACTION_DATABASE	BCR_SIGNALING_PATHWAY	200006	http://pid.nci.nih.gov/search/pathway_landing.shtml?what=graphic&jpg=on&pathway_id=200006	68	8	5	0.243
PATHWAY_INTERACTION_DATABASE	E2F_TRANSCRIPTION_FACTOR_NETWORK	200032	http://pid.nci.nih.gov/search/pathway_landing.shtml?what=graphic&jpg=on&pathway_id=200032	73	10	3	0.239
KEGG	COLORECTAL_CANCER	5210	http://www.kegg.jp/kegg-bin/show_pathway?hsa05210+hsa:1499+hsa:26060+hsa:3845+hsa:4087+hsa:5295+hsa:596+hsa:6932+hsa:7042+hsa:8503	62	9	5	0.239
PATHWAY_INTERACTION_DATABASE	SIGNALING_EVENTS_MEDIATED_BY_PTP1B	200042	http://pid.nci.nih.gov/search/pathway_landing.shtml?what=graphic&jpg=on&pathway_id=200042	52	7	5	0.234
KEGG	FC_GAMMA_R-MEDIATED_PHAGOCYTOSIS	4666	http://www.kegg.jp/kegg-bin/show_pathway?hsa04666+hsa:10092+hsa:10163+hsa:23396+hsa:382+hsa:50807+hsa:5295+hsa:5581+hsa:8394+hsa:8503+hsa:8613+hsa:8976+hsa:998	94	12	5	0.228
PATHWAY_INTERACTION_DATABASE	IL2-MEDIATED_SIGNALING_EVENTS	200098	http://pid.nci.nih.gov/search/pathway_landing.shtml?what=graphic&jpg=on&pathway_id=200098	54	6	4	0.226
KEGG	SHIGELLOSIS	5131	http://www.kegg.jp/kegg-bin/show_pathway?hsa05131+hsa:10092+hsa:10163+hsa:1445+hsa:3678+hsa:5217+hsa:60+hsa:6093+hsa:8976+hsa:998	61	9	5	0.222
PATHWAY_INTERACTION_DATABASE	GLYPICAN_1_NETWORK	200026	http://pid.nci.nih.gov/search/pathway_landing.shtml?what=graphic&jpg=on&pathway_id=200026	27	5	4	0.222
PATHWAY_INTERACTION_DATABASE	A6B1_AND_A6B4_INTEGRIN_SIGNALING	200191	http://pid.nci.nih.gov/search/pathway_landing.shtml?what=graphic&jpg=on&pathway_id=200191	44	5	4	0.222
KEGG	LYSINE_DEGRADATION	310	http://www.kegg.jp/kegg-bin/show_pathway?hsa00310+hsa:51111+hsa:55870+hsa:6839+hsa:80854+hsa:84787+hsa:9739	44	6	5	0.222
KEGG	GASTRIC_ACID_SECRETION	4971	http://www.kegg.jp/kegg-bin/show_pathway?hsa04971+hsa:109+hsa:112+hsa:3708+hsa:3776+hsa:4638+hsa:478+hsa:54207+hsa:5567+hsa:60+hsa:6548+hsa:815+hsa:818	74	12	5	0.222
PATHWAY_INTERACTION_DATABASE	NETRIN-MEDIATED_SIGNALING_EVENTS	200088	http://pid.nci.nih.gov/search/pathway_landing.shtml?what=graphic&jpg=on&pathway_id=200088	30	7	2	0.222
KEGG	PROGESTERONE-MEDIATED_OOCYTE_MATURATION	4914	http://www.kegg.jp/kegg-bin/show_pathway?hsa04914+hsa:109+hsa:112+hsa:245711+hsa:3479+hsa:3480+hsa:3845+hsa:5295+hsa:5567+hsa:6197+hsa:8503+hsa:996	86	11	4	0.221
KEGG	THYROID_CANCER	5216	http://www.kegg.jp/kegg-bin/show_pathway?hsa05216+hsa:1499+hsa:3845+hsa:6932+hsa:8030	29	4	5	0.22
PATHWAY_INTERACTION_DATABASE	CXCR4-MEDIATED_SIGNALING_EVENTS	200099	http://pid.nci.nih.gov/search/pathway_landing.shtml?what=graphic&jpg=on&pathway_id=200099	102	13	3	0.219
PATHWAY_INTERACTION_DATABASE	TCR_SIGNALING_IN_NAIVE_CD4+_T_CELLS	200027	http://pid.nci.nih.gov/search/pathway_landing.shtml?what=graphic&jpg=on&pathway_id=200027	64	7	4	0.219
PATHWAY_INTERACTION_DATABASE	IGF1_PATHWAY	200100	http://pid.nci.nih.gov/search/pathway_landing.shtml?what=graphic&jpg=on&pathway_id=200100	29	4	4	0.218
PATHWAY_INTERACTION_DATABASE	RAC1_SIGNALING_PATHWAY	200223	http://pid.nci.nih.gov/search/pathway_landing.shtml?what=graphic&jpg=on&pathway_id=200223	54	9	5	0.216
PATHWAY_INTERACTION_DATABASE	REGULATION_OF_P38-ALPHA_AND_P38-BETA	200066	http://pid.nci.nih.gov/search/pathway_landing.shtml?what=graphic&jpg=on&pathway_id=200066	31	6	3	0.215
KEGG	VASOPRESSIN-REGULATED_WATER_REABSORPTION	4962	http://www.kegg.jp/kegg-bin/show_pathway?hsa04962+hsa:109+hsa:112+hsa:1385+hsa:4905+hsa:5567+hsa:5868+hsa:64764+hsa:9586	44	8	4	0.214
PATHWAY_INTERACTION_DATABASE	DOWNSTREAM_SIGNALING_IN_NAIVE_CD8+_T_CELLS	200216	http://pid.nci.nih.gov/search/pathway_landing.shtml?what=graphic&jpg=on&pathway_id=200216	68	7	4	0.213
PATHWAY_INTERACTION_DATABASE	CDC42_SIGNALING_EVENTS	200069	http://pid.nci.nih.gov/search/pathway_landing.shtml?what=graphic&jpg=on&pathway_id=200069	70	10	4	0.213
PATHWAY_INTERACTION_DATABASE	ERBB2_ERBB3_SIGNALING_EVENTS	200141	http://pid.nci.nih.gov/search/pathway_landing.shtml?what=graphic&jpg=on&pathway_id=200141	42	5	4	0.212
KEGG	CHEMOKINE_SIGNALING_PATHWAY	4062	http://www.kegg.jp/kegg-bin/show_pathway?hsa04062+hsa:109+hsa:112+hsa:1445+hsa:2869+hsa:2885+hsa:3845+hsa:5295+hsa:5567+hsa:5908+hsa:6093+hsa:6374+hsa:8503+hsa:8976+hsa:998	189	14	6	0.208
PATHWAY_INTERACTION_DATABASE	ARF6_TRAFFICKING_EVENTS	200057	http://pid.nci.nih.gov/search/pathway_landing.shtml?what=graphic&jpg=on&pathway_id=200057	49	9	3	0.207
KEGG	NEUROACTIVE_LIGAND-RECEPTOR_INTERACTION	4080	http://www.kegg.jp/kegg-bin/show_pathway?hsa04080+hsa:1129+hsa:1133+hsa:153+hsa:1906+hsa:1910+hsa:2550+hsa:2561+hsa:2562+hsa:2641+hsa:2690+hsa:2846+hsa:2890+hsa:2891+hsa:2892+hsa:2908+hsa:2911+hsa:3358+hsa:3360+hsa:4922+hsa:4988+hsa:5733+hsa:5734+hsa:799	318	23	5	0.206
PATHWAY_INTERACTION_DATABASE	P73_TRANSCRIPTION_FACTOR_NETWORK	200017	http://pid.nci.nih.gov/search/pathway_landing.shtml?what=graphic&jpg=on&pathway_id=200017	73	8	5	0.206
KEGG	PANCREATIC_SECRETION	4972	http://www.kegg.jp/kegg-bin/show_pathway?hsa04972+hsa:109+hsa:112+hsa:1811+hsa:3708+hsa:4218+hsa:478+hsa:488+hsa:492+hsa:5908+hsa:6262+hsa:6548+hsa:8671	103	12	4	0.206
PATHWAY_INTERACTION_DATABASE	VALIDATED_NUCLEAR_ESTROGEN_RECEPTOR_ALPHA_NETWORK	200159	http://pid.nci.nih.gov/search/pathway_landing.shtml?what=graphic&jpg=on&pathway_id=200159	63	5	3	0.205
PATHWAY_INTERACTION_DATABASE	GMCSF-MEDIATED_SIGNALING_EVENTS	200019	http://pid.nci.nih.gov/search/pathway_landing.shtml?what=graphic&jpg=on&pathway_id=200019	36	4	4	0.203
PATHWAY_INTERACTION_DATABASE	WNT_SIGNALING_NETWORK	200067	http://pid.nci.nih.gov/search/pathway_landing.shtml?what=graphic&jpg=on&pathway_id=200067	28	4	4	0.202
KEGG	LONG-TERM_DEPRESSION	4730	http://www.kegg.jp/kegg-bin/show_pathway?hsa04730+hsa:2890+hsa:2891+hsa:2892+hsa:2911+hsa:3479+hsa:3480+hsa:3708+hsa:3845+hsa:5592	70	9	4	0.198
KEGG	SPLICEOSOME	3040	http://www.kegg.jp/kegg-bin/show_pathway?hsa03040+hsa:10285+hsa:23350+hsa:3178+hsa:3183+hsa:3192+hsa:55119+hsa:6426+hsa:6427+hsa:6434	127	9	5	0.198
KEGG	P53_SIGNALING_PATHWAY	4115	http://www.kegg.jp/kegg-bin/show_pathway?hsa04115+hsa:1021+hsa:143686+hsa:27244+hsa:3479+hsa:5728+hsa:575+hsa:894+hsa:9134	68	8	5	0.196
KEGG	VIRAL_MYOCARDITIS	5416	http://www.kegg.jp/kegg-bin/show_pathway?hsa05416+hsa:1605+hsa:1756+hsa:4627+hsa:4628+hsa:60+hsa:940	70	6	5	0.195
KEGG	FC_EPSILON_RI_SIGNALING_PATHWAY	4664	http://www.kegg.jp/kegg-bin/show_pathway?hsa04664+hsa:2206+hsa:2885+hsa:3845+hsa:5295+hsa:5581+hsa:6416+hsa:8503	79	7	5	0.193
PATHWAY_INTERACTION_DATABASE	PLASMA_MEMBRANE_ESTROGEN_RECEPTOR_SIGNALING	200034	http://pid.nci.nih.gov/search/pathway_landing.shtml?what=graphic&jpg=on&pathway_id=200034	39	4	4	0.193
PATHWAY_INTERACTION_DATABASE	IL3-MEDIATED_SIGNALING_EVENTS	200146	http://pid.nci.nih.gov/search/pathway_landing.shtml?what=graphic&jpg=on&pathway_id=200146	27	3	3	0.193
PATHWAY_INTERACTION_DATABASE	P38_MAPK_SIGNALING_PATHWAY	200018	http://pid.nci.nih.gov/search/pathway_landing.shtml?what=graphic&jpg=on&pathway_id=200018	29	3	4	0.193
KEGG	HEPATITIS_C	5160	http://www.kegg.jp/kegg-bin/show_pathway?hsa05160+hsa:2885+hsa:29110+hsa:3455+hsa:3659+hsa:3845+hsa:5010+hsa:5295+hsa:5522+hsa:7187+hsa:8503	134	10	5	0.192
PATHWAY_INTERACTION_DATABASE	RETINOIC_ACID_RECEPTORS-MEDIATED_SIGNALING	200165	http://pid.nci.nih.gov/search/pathway_landing.shtml?what=graphic&jpg=on&pathway_id=200165	27	4	4	0.192
PATHWAY_INTERACTION_DATABASE	SYNDECAN-1-MEDIATED_SIGNALING_EVENTS	200157	http://pid.nci.nih.gov/search/pathway_landing.shtml?what=graphic&jpg=on&pathway_id=200157	46	8	3	0.188
PATHWAY_INTERACTION_DATABASE	INSULIN_PATHWAY	200014	http://pid.nci.nih.gov/search/pathway_landing.shtml?what=graphic&jpg=on&pathway_id=200014	44	5	4	0.188
PATHWAY_INTERACTION_DATABASE	HIF-2-ALPHA_TRANSCRIPTION_FACTOR_NETWORK	200036	http://pid.nci.nih.gov/search/pathway_landing.shtml?what=graphic&jpg=on&pathway_id=200036	34	4	4	0.186
PATHWAY_INTERACTION_DATABASE	GLUCOCORTICOID_RECEPTOR_REGULATORY_NETWORK	200091	http://pid.nci.nih.gov/search/pathway_landing.shtml?what=graphic&jpg=on&pathway_id=200091	82	10	5	0.185
KEGG	RIG-I-LIKE_RECEPTOR_SIGNALING_PATHWAY	4622	http://www.kegg.jp/kegg-bin/show_pathway?hsa04622+hsa:1654+hsa:29110+hsa:55593+hsa:7187+hsa:843+hsa:8653	71	6	4	0.184
KEGG	UBIQUITIN_MEDIATED_PROTEOLYSIS	4120	http://www.kegg.jp/kegg-bin/show_pathway?hsa04120+hsa:11060+hsa:23327+hsa:331+hsa:54926+hsa:55284+hsa:55294+hsa:57154+hsa:65264+hsa:8065+hsa:8924+hsa:90293+hsa:9354+hsa:996	135	13	5	0.184
KEGG	CYTOKINE-CYTOKINE_RECEPTOR_INTERACTION	4060	http://www.kegg.jp/kegg-bin/show_pathway?hsa04060+hsa:2690+hsa:3082+hsa:3455+hsa:356+hsa:3625+hsa:3977+hsa:4233+hsa:5156+hsa:6374+hsa:659+hsa:7042+hsa:7422+hsa:91	275	13	5	0.183
PATHWAY_INTERACTION_DATABASE	ALPHA4_BETA1_INTEGRIN_SIGNALING_EVENTS	200222	http://pid.nci.nih.gov/search/pathway_landing.shtml?what=graphic&jpg=on&pathway_id=200222	32	5	3	0.183
KEGG	JAK-STAT_SIGNALING_PATHWAY	4630	http://www.kegg.jp/kegg-bin/show_pathway?hsa04630+hsa:161742+hsa:2690+hsa:2885+hsa:3455+hsa:3977+hsa:5295+hsa:8503+hsa:8835+hsa:894+hsa:9655	155	10	4	0.181
KEGG	PROTEIN_PROCESSING_IN_ENDOPLASMIC_RETICULUM	4141	http://www.kegg.jp/kegg-bin/show_pathway?hsa04141+hsa:10484+hsa:10802+hsa:11231+hsa:29978+hsa:3337+hsa:4287+hsa:54788+hsa:55432+hsa:5886+hsa:596+hsa:6238+hsa:9632+hsa:9695	166	13	5	0.18
PATHWAY_INTERACTION_DATABASE	CLASS_I_PI3K_SIGNALING_EVENTS_MEDIATED_BY_AKT	200198	http://pid.nci.nih.gov/search/pathway_landing.shtml?what=graphic&jpg=on&pathway_id=200198	34	5	5	0.18
KEGG	AMOEBIASIS	5146	http://www.kegg.jp/kegg-bin/show_pathway?hsa05146+hsa:1278+hsa:1288+hsa:1289+hsa:1301+hsa:3915+hsa:5295+hsa:5567+hsa:5868+hsa:7042+hsa:7879+hsa:8503	105	11	3	0.18
PATHWAY_INTERACTION_DATABASE	HEDGEHOG_SIGNALING_EVENTS_MEDIATED_BY_GLI_PROTEINS	200173	http://pid.nci.nih.gov/search/pathway_landing.shtml?what=graphic&jpg=on&pathway_id=200173	48	5	4	0.179
KEGG	RNA_DEGRADATION	3018	http://www.kegg.jp/kegg-bin/show_pathway?hsa03018+hsa:11044+hsa:22803+hsa:246175+hsa:4848+hsa:54464+hsa:64895	57	6	5	0.179
PATHWAY_INTERACTION_DATABASE	FOXA2_AND_FOXA3_TRANSCRIPTION_FACTOR_NETWORKS	200087	http://pid.nci.nih.gov/search/pathway_landing.shtml?what=graphic&jpg=on&pathway_id=200087	45	6	3	0.177
KEGG	CARDIAC_MUSCLE_CONTRACTION	4260	http://www.kegg.jp/kegg-bin/show_pathway?hsa04260+hsa:10479+hsa:478+hsa:488+hsa:6262+hsa:6548+hsa:70+hsa:7168+hsa:776	77	8	4	0.176
KEGG	RNA_TRANSPORT	3013	http://www.kegg.jp/kegg-bin/show_pathway?hsa03013+hsa:11171+hsa:1975+hsa:26019+hsa:348995+hsa:59343+hsa:65109+hsa:7514+hsa:8487+hsa:9818+hsa:9972	144	10	5	0.172
PATHWAY_INTERACTION_DATABASE	CERAMIDE_SIGNALING_PATHWAY	200119	http://pid.nci.nih.gov/search/pathway_landing.shtml?what=graphic&jpg=on&pathway_id=200119	48	6	5	0.171
PATHWAY_INTERACTION_DATABASE	IL2_SIGNALING_EVENTS_MEDIATED_BY_PI3K	200118	http://pid.nci.nih.gov/search/pathway_landing.shtml?what=graphic&jpg=on&pathway_id=200118	37	3	3	0.171
PATHWAY_INTERACTION_DATABASE	TCR_SIGNALING_IN_NAIVE_CD8+_T_CELLS	200075	http://pid.nci.nih.gov/search/pathway_landing.shtml?what=graphic&jpg=on&pathway_id=200075	51	4	4	0.17
KEGG	PHOSPHATIDYLINOSITOL_SIGNALING_SYSTEM	4070	http://www.kegg.jp/kegg-bin/show_pathway?hsa04070+hsa:200576+hsa:23396+hsa:3708+hsa:5295+hsa:5728+hsa:8394+hsa:8503+hsa:8867	78	8	4	0.169
KEGG	MATURITY_ONSET_DIABETES_OF_THE_YOUNG	4950	http://www.kegg.jp/kegg-bin/show_pathway?hsa04950+hsa:4760+hsa:5080+hsa:6928	25	3	4	0.169
PATHWAY_INTERACTION_DATABASE	SYNDECAN-2-MEDIATED_SIGNALING_EVENTS	200193	http://pid.nci.nih.gov/search/pathway_landing.shtml?what=graphic&jpg=on&pathway_id=200193	33	5	2	0.169
KEGG	EPITHELIAL_CELL_SIGNALING_IN_HELICOBACTER_PYLORI_INFECTION	5120	http://www.kegg.jp/kegg-bin/show_pathway?hsa05120+hsa:102+hsa:1445+hsa:28964+hsa:4233+hsa:526+hsa:6416+hsa:7082+hsa:998	68	8	5	0.167
PATHWAY_INTERACTION_DATABASE	IL12-MEDIATED_SIGNALING_EVENTS	200045	http://pid.nci.nih.gov/search/pathway_landing.shtml?what=graphic&jpg=on&pathway_id=200045	65	4	5	0.166
PATHWAY_INTERACTION_DATABASE	FC-EPSILON_RECEPTOR_I_SIGNALING_IN_MAST_CELLS	200004	http://pid.nci.nih.gov/search/pathway_landing.shtml?what=graphic&jpg=on&pathway_id=200004	61	5	4	0.165
PATHWAY_INTERACTION_DATABASE	IFN-GAMMA_PATHWAY	200130	http://pid.nci.nih.gov/search/pathway_landing.shtml?what=graphic&jpg=on&pathway_id=200130	42	6	3	0.165
PATHWAY_INTERACTION_DATABASE	LPA_RECEPTOR_MEDIATED_EVENTS	200013	http://pid.nci.nih.gov/search/pathway_landing.shtml?what=graphic&jpg=on&pathway_id=200013	66	6	4	0.164
PATHWAY_INTERACTION_DATABASE	LKB1_SIGNALING_EVENTS	200074	http://pid.nci.nih.gov/search/pathway_landing.shtml?what=graphic&jpg=on&pathway_id=200074	46	6	4	0.163
PATHWAY_INTERACTION_DATABASE	INTEGRIN-LINKED_KINASE_SIGNALING	200064	http://pid.nci.nih.gov/search/pathway_landing.shtml?what=graphic&jpg=on&pathway_id=200064	45	7	4	0.161
KEGG	HEDGEHOG_SIGNALING_PATHWAY	4340	http://www.kegg.jp/kegg-bin/show_pathway?hsa04340+hsa:51715+hsa:53944+hsa:5567+hsa:5727+hsa:64399+hsa:7474	56	6	5	0.158
KEGG	PATHOGENIC_ESCHERICHIA_COLI_INFECTION	5130	http://www.kegg.jp/kegg-bin/show_pathway?hsa05130+hsa:10092+hsa:1499+hsa:60+hsa:6093+hsa:7846+hsa:8976+hsa:998	56	7	5	0.158
KEGG	VASCULAR_SMOOTH_MUSCLE_CONTRACTION	4270	http://www.kegg.jp/kegg-bin/show_pathway?hsa04270+hsa:109+hsa:112+hsa:133+hsa:1906+hsa:3708+hsa:4638+hsa:4659+hsa:5567+hsa:5581+hsa:5592+hsa:6093+hsa:776	126	12	4	0.157
PATHWAY_INTERACTION_DATABASE	PRESENILIN_ACTION_IN_NOTCH_AND_WNT_SIGNALING	200063	http://pid.nci.nih.gov/search/pathway_landing.shtml?what=graphic&jpg=on&pathway_id=200063	46	4	4	0.156
PATHWAY_INTERACTION_DATABASE	ENDOTHELINS	200005	http://pid.nci.nih.gov/search/pathway_landing.shtml?what=graphic&jpg=on&pathway_id=200005	62	8	2	0.156
PATHWAY_INTERACTION_DATABASE	TNF_RECEPTOR_SIGNALING_PATHWAY	200102	http://pid.nci.nih.gov/search/pathway_landing.shtml?what=graphic&jpg=on&pathway_id=200102	46	5	4	0.156
PATHWAY_INTERACTION_DATABASE	ARF6_SIGNALING_EVENTS	200073	http://pid.nci.nih.gov/search/pathway_landing.shtml?what=graphic&jpg=on&pathway_id=200073	35	5	4	0.155
PATHWAY_INTERACTION_DATABASE	ATF-2_TRANSCRIPTION_FACTOR_NETWORK	200136	http://pid.nci.nih.gov/search/pathway_landing.shtml?what=graphic&jpg=on&pathway_id=200136	58	7	3	0.154
PATHWAY_INTERACTION_DATABASE	AURORA_A_SIGNALING	200195	http://pid.nci.nih.gov/search/pathway_landing.shtml?what=graphic&jpg=on&pathway_id=200195	31	3	3	0.154
KEGG	NOTCH_SIGNALING_PATHWAY	4330	http://www.kegg.jp/kegg-bin/show_pathway?hsa04330+hsa:1857+hsa:23220+hsa:8650+hsa:8850+hsa:9612	47	5	5	0.153
KEGG	VIBRIO_CHOLERAE_INFECTION	5110	http://www.kegg.jp/kegg-bin/show_pathway?hsa05110+hsa:109+hsa:10945+hsa:526+hsa:5567+hsa:60+hsa:7082	54	6	5	0.153
PATHWAY_INTERACTION_DATABASE	CLASS_I_PI3K_SIGNALING_EVENTS	200116	http://pid.nci.nih.gov/search/pathway_landing.shtml?what=graphic&jpg=on&pathway_id=200116	47	6	3	0.152
KEGG	SALIVARY_SECRETION	4970	http://www.kegg.jp/kegg-bin/show_pathway?hsa04970+hsa:109+hsa:112+hsa:153+hsa:3708+hsa:478+hsa:492+hsa:5567+hsa:5592+hsa:6548	89	9	4	0.151
PATHWAY_INTERACTION_DATABASE	CALCINEURIN-REGULATED_NFAT-DEPENDENT_TRANSCRIPTION_IN_LYMPHOCYTES	200050	http://pid.nci.nih.gov/search/pathway_landing.shtml?what=graphic&jpg=on&pathway_id=200050	50	7	4	0.151
PATHWAY_INTERACTION_DATABASE	CASPASE_CASCADE_IN_APOPTOSIS	200174	http://pid.nci.nih.gov/search/pathway_landing.shtml?what=graphic&jpg=on&pathway_id=200174	56	5	2	0.15
KEGG	ALZHEIMER'S_DISEASE	5010	http://www.kegg.jp/kegg-bin/show_pathway?hsa05010+hsa:102+hsa:11261+hsa:23621+hsa:3708+hsa:488+hsa:5534+hsa:776+hsa:8851	168	8	4	0.145
PATHWAY_INTERACTION_DATABASE	INTEGRIN_FAMILY_CELL_SURFACE_INTERACTIONS	200039	http://pid.nci.nih.gov/search/pathway_landing.shtml?what=graphic&jpg=on&pathway_id=200039	26	5	2	0.145
PATHWAY_INTERACTION_DATABASE	REGULATION_OF_CDC42_ACTIVITY	200071	http://pid.nci.nih.gov/search/pathway_landing.shtml?what=graphic&jpg=on&pathway_id=200071	30	4	3	0.145
PATHWAY_INTERACTION_DATABASE	TRAIL_SIGNALING_PATHWAY	200068	http://pid.nci.nih.gov/search/pathway_landing.shtml?what=graphic&jpg=on&pathway_id=200068	28	4	3	0.145
KEGG	O-GLYCAN_BIOSYNTHESIS	512	http://www.kegg.jp/kegg-bin/show_pathway?hsa00512+hsa:114805+hsa:2589+hsa:51301+hsa:51809	30	4	2	0.141
KEGG	PHAGOSOME	4145	http://www.kegg.jp/kegg-bin/show_pathway?hsa04145+hsa:200576+hsa:23673+hsa:3678+hsa:3685+hsa:3690+hsa:4074+hsa:526+hsa:5868+hsa:60+hsa:7846+hsa:7879	154	11	5	0.141
KEGG	HUNTINGTON'S_DISEASE	5016	http://www.kegg.jp/kegg-bin/show_pathway?hsa05016+hsa:1385+hsa:23186+hsa:2911+hsa:292+hsa:3708+hsa:4899+hsa:64764+hsa:6667+hsa:7417+hsa:9586	183	10	4	0.14
KEGG	TOXOPLASMOSIS	5145	http://www.kegg.jp/kegg-bin/show_pathway?hsa05145+hsa:331+hsa:3655+hsa:3915+hsa:5295+hsa:596+hsa:7042+hsa:8503	132	7	3	0.136
PATHWAY_INTERACTION_DATABASE	VALIDATED_TRANSCRIPTIONAL_TARGETS_OF_AP1_FAMILY_MEMBERS_FRA1_AND_FRA2	200055	http://pid.nci.nih.gov/search/pathway_landing.shtml?what=graphic&jpg=on&pathway_id=200055	35	4	4	0.135
KEGG	CARBOHYDRATE_DIGESTION_AND_ABSORPTION	4973	http://www.kegg.jp/kegg-bin/show_pathway?hsa04973+hsa:478+hsa:5295+hsa:776+hsa:8503	43	4	4	0.134
PATHWAY_INTERACTION_DATABASE	PLK1_SIGNALING_EVENTS	200103	http://pid.nci.nih.gov/search/pathway_landing.shtml?what=graphic&jpg=on&pathway_id=200103	44	4	4	0.134
PATHWAY_INTERACTION_DATABASE	SIGNALING_EVENTS_MEDIATED_BY_HDAC_CLASS_III	200025	http://pid.nci.nih.gov/search/pathway_landing.shtml?what=graphic&jpg=on&pathway_id=200025	39	5	3	0.134
KEGG	LEUKOCYTE_TRANSENDOTHELIAL_MIGRATION	4670	http://www.kegg.jp/kegg-bin/show_pathway?hsa04670+hsa:1499+hsa:5010+hsa:5295+hsa:5908+hsa:60+hsa:6093+hsa:8503+hsa:998	116	8	5	0.133
KEGG	TYPE_II_DIABETES_MELLITUS	4930	http://www.kegg.jp/kegg-bin/show_pathway?hsa04930+hsa:5295+hsa:5581+hsa:776+hsa:8503+hsa:8835	47	5	4	0.133
KEGG	SELENOAMINO_ACID_METABOLISM	450	http://www.kegg.jp/kegg-bin/show_pathway?hsa00450+hsa:22928+hsa:23382	26	2	2	0.13
KEGG	PRION_DISEASES	5020	http://www.kegg.jp/kegg-bin/show_pathway?hsa05020+hsa:1958+hsa:3915+hsa:4684+hsa:5567	36	4	2	0.13
KEGG	PROTEIN_DIGESTION_AND_ABSORPTION	4974	http://www.kegg.jp/kegg-bin/show_pathway?hsa04974+hsa:1278+hsa:1288+hsa:1289+hsa:1301+hsa:1303+hsa:1306+hsa:478+hsa:54407	80	8	3	0.13
PATHWAY_INTERACTION_DATABASE	OSTEOPONTIN-MEDIATED_EVENTS	200053	http://pid.nci.nih.gov/search/pathway_landing.shtml?what=graphic&jpg=on&pathway_id=200053	31	5	3	0.126
KEGG	LYSOSOME	4142	http://www.kegg.jp/kegg-bin/show_pathway?hsa04142+hsa:164+hsa:175+hsa:26985+hsa:2799+hsa:4074+hsa:8943	121	6	4	0.123
PATHWAY_INTERACTION_DATABASE	FAS_(CD95)_SIGNALING_PATHWAY	200080	http://pid.nci.nih.gov/search/pathway_landing.shtml?what=graphic&jpg=on&pathway_id=200080	38	4	3	0.123
KEGG	CHAGAS_DISEASE	5142	http://www.kegg.jp/kegg-bin/show_pathway?hsa05142+hsa:356+hsa:4087+hsa:5295+hsa:5522+hsa:6416+hsa:7042+hsa:8503	104	7	4	0.121
KEGG	PURINE_METABOLISM	230	http://www.kegg.jp/kegg-bin/show_pathway?hsa00230+hsa:109+hsa:112+hsa:132+hsa:159+hsa:5142+hsa:5151	161	6	3	0.118
PATHWAY_INTERACTION_DATABASE	FOXM1_TRANSCRIPTION_FACTOR_NETWORK	200142	http://pid.nci.nih.gov/search/pathway_landing.shtml?what=graphic&jpg=on&pathway_id=200142	41	2	1	0.116
PATHWAY_INTERACTION_DATABASE	NOTCH_SIGNALING_PATHWAY	200015	http://pid.nci.nih.gov/search/pathway_landing.shtml?what=graphic&jpg=on&pathway_id=200015	59	5	3	0.116
KEGG	PEROXISOME	4146	http://www.kegg.jp/kegg-bin/show_pathway?hsa04146+hsa:2182+hsa:3417+hsa:51+hsa:570+hsa:84188+hsa:8540	79	6	4	0.115
KEGG	CYSTEINE_AND_METHIONINE_METABOLISM	270	http://www.kegg.jp/kegg-bin/show_pathway?hsa00270+hsa:1788+hsa:23382	36	2	2	0.112
PATHWAY_INTERACTION_DATABASE	MTOR_SIGNALING_PATHWAY	200096	http://pid.nci.nih.gov/search/pathway_landing.shtml?what=graphic&jpg=on&pathway_id=200096	68	6	2	0.112
PATHWAY_INTERACTION_DATABASE	VALIDATED_TRANSCRIPTIONAL_TARGETS_OF_DELTANP63_ISOFORMS	200187	http://pid.nci.nih.gov/search/pathway_landing.shtml?what=graphic&jpg=on&pathway_id=200187	45	5	2	0.11
KEGG	INOSITOL_PHOSPHATE_METABOLISM	562	http://www.kegg.jp/kegg-bin/show_pathway?hsa00562+hsa:200576+hsa:23396+hsa:5728+hsa:8394+hsa:8867	57	5	3	0.11
PATHWAY_INTERACTION_DATABASE	ALPHA9_BETA1_INTEGRIN_SIGNALING_EVENTS	200093	http://pid.nci.nih.gov/search/pathway_landing.shtml?what=graphic&jpg=on&pathway_id=200093	25	2	3	0.109
PATHWAY_INTERACTION_DATABASE	CXCR3-MEDIATED_SIGNALING_EVENTS	200176	http://pid.nci.nih.gov/search/pathway_landing.shtml?what=graphic&jpg=on&pathway_id=200176	42	3	3	0.105
PATHWAY_INTERACTION_DATABASE	VALIDATED_TARGETS_OF_C-MYC_TRANSCRIPTIONAL_ACTIVATION	200056	http://pid.nci.nih.gov/search/pathway_landing.shtml?what=graphic&jpg=on&pathway_id=200056	81	6	3	0.103
PATHWAY_INTERACTION_DATABASE	REELIN_SIGNALING_PATHWAY	200062	http://pid.nci.nih.gov/search/pathway_landing.shtml?what=graphic&jpg=on&pathway_id=200062	29	4	2	0.102
PATHWAY_INTERACTION_DATABASE	S1P3_PATHWAY	200046	http://pid.nci.nih.gov/search/pathway_landing.shtml?what=graphic&jpg=on&pathway_id=200046	29	3	3	0.102
PATHWAY_INTERACTION_DATABASE	P75(NTR)-MEDIATED_SIGNALING	200123	http://pid.nci.nih.gov/search/pathway_landing.shtml?what=graphic&jpg=on&pathway_id=200123	67	4	2	0.102
PATHWAY_INTERACTION_DATABASE	REGULATION_OF_RHOA_ACTIVITY	200061	http://pid.nci.nih.gov/search/pathway_landing.shtml?what=graphic&jpg=on&pathway_id=200061	46	5	3	0.101
KEGG	BLADDER_CANCER	5219	http://www.kegg.jp/kegg-bin/show_pathway?hsa05219+hsa:1871+hsa:3845+hsa:7422	42	3	4	0.101
PATHWAY_INTERACTION_DATABASE	REGULATION_OF_RAC1_ACTIVITY	200194	http://pid.nci.nih.gov/search/pathway_landing.shtml?what=graphic&jpg=on&pathway_id=200194	38	3	3	0.097
KEGG	MALARIA	5144	http://www.kegg.jp/kegg-bin/show_pathway?hsa05144+hsa:3082+hsa:4233+hsa:6383+hsa:7042	51	4	4	0.096
PATHWAY_INTERACTION_DATABASE	VALIDATED_TRANSCRIPTIONAL_TARGETS_OF_TAP63_ISOFORMS	200204	http://pid.nci.nih.gov/search/pathway_landing.shtml?what=graphic&jpg=on&pathway_id=200204	51	3	3	0.096
PATHWAY_INTERACTION_DATABASE	P53_PATHWAY	200207	http://pid.nci.nih.gov/search/pathway_landing.shtml?what=graphic&jpg=on&pathway_id=200207	58	4	3	0.095
PATHWAY_INTERACTION_DATABASE	ATM_PATHWAY	200072	http://pid.nci.nih.gov/search/pathway_landing.shtml?what=graphic&jpg=on&pathway_id=200072	34	2	2	0.093
KEGG	ADIPOCYTOKINE_SIGNALING_PATHWAY	4920	http://www.kegg.jp/kegg-bin/show_pathway?hsa04920+hsa:2182+hsa:5565+hsa:5571+hsa:79602	68	4	3	0.093
KEGG	TOLL-LIKE_RECEPTOR_SIGNALING_PATHWAY	4620	http://www.kegg.jp/kegg-bin/show_pathway?hsa04620+hsa:29110+hsa:3455+hsa:5295+hsa:6416+hsa:7187+hsa:8503	102	6	3	0.092
KEGG	ALANINE_ASPARTATE_AND_GLUTAMATE_METABOLISM	250	http://www.kegg.jp/kegg-bin/show_pathway?hsa00250+hsa:159+hsa:2744+hsa:9945	32	3	2	0.09
KEGG	PPAR_SIGNALING_PATHWAY	3320	http://www.kegg.jp/kegg-bin/show_pathway?hsa03320+hsa:2182+hsa:51+hsa:6319	70	3	3	0.089
PATHWAY_INTERACTION_DATABASE	AURORA_B_SIGNALING	200012	http://pid.nci.nih.gov/search/pathway_landing.shtml?what=graphic&jpg=on&pathway_id=200012	41	4	3	0.087
KEGG	GLYCOSAMINOGLYCAN_BIOSYNTHESIS_HEPARAN_SULFATE	534	http://www.kegg.jp/kegg-bin/show_pathway?hsa00534+hsa:26035+hsa:64132+hsa:9653	26	3	3	0.086
PATHWAY_INTERACTION_DATABASE	UROKINASE-TYPE_PLASMINOGEN_ACTIVATOR_(UPA)_AND_UPAR-MEDIATED_SIGNALING	200140	http://pid.nci.nih.gov/search/pathway_landing.shtml?what=graphic&jpg=on&pathway_id=200140	42	4	2	0.081
KEGG	GLYCEROPHOSPHOLIPID_METABOLISM	564	http://www.kegg.jp/kegg-bin/show_pathway?hsa00564+hsa:1119+hsa:56894+hsa:8613+hsa:9468+hsa:9926	79	5	3	0.079
PATHWAY_INTERACTION_DATABASE	THROMBOXANE_A2_RECEPTOR_SIGNALING	200082	http://pid.nci.nih.gov/search/pathway_landing.shtml?what=graphic&jpg=on&pathway_id=200082	56	3	3	0.079
PATHWAY_INTERACTION_DATABASE	AMB2_INTEGRIN_SIGNALING	200128	http://pid.nci.nih.gov/search/pathway_landing.shtml?what=graphic&jpg=on&pathway_id=200128	41	3	3	0.077
PATHWAY_INTERACTION_DATABASE	HIV-1_NEF_NEGATIVE_EFFECTOR_OF_FAS_AND_TNF-ALPHA	200156	http://pid.nci.nih.gov/search/pathway_landing.shtml?what=graphic&jpg=on&pathway_id=200156	35	3	3	0.077
KEGG	COMPLEMENT_AND_COAGULATION_CASCADES	4610	http://www.kegg.jp/kegg-bin/show_pathway?hsa04610+hsa:2162+hsa:3827+hsa:966	69	3	3	0.077
PATHWAY_INTERACTION_DATABASE	ALK1_SIGNALING_EVENTS	200149	http://pid.nci.nih.gov/search/pathway_landing.shtml?what=graphic&jpg=on&pathway_id=200149	25	2	2	0.076
KEGG	PARKINSON'S_DISEASE	5012	http://www.kegg.jp/kegg-bin/show_pathway?hsa05012+hsa:292+hsa:7417	130	2	2	0.075
PATHWAY_INTERACTION_DATABASE	NONGENOTROPIC_ANDROGEN_SIGNALING	200171	http://pid.nci.nih.gov/search/pathway_landing.shtml?what=graphic&jpg=on&pathway_id=200171	30	3	2	0.071
PATHWAY_INTERACTION_DATABASE	IL1-MEDIATED_SIGNALING_EVENTS	200089	http://pid.nci.nih.gov/search/pathway_landing.shtml?what=graphic&jpg=on&pathway_id=200089	35	2	2	0.067
KEGG	ETHER_LIPID_METABOLISM	565	http://www.kegg.jp/kegg-bin/show_pathway?hsa00565+hsa:5048+hsa:8540+hsa:8613	35	3	2	0.067
KEGG	BASAL_TRANSCRIPTION_FACTORS	3022	http://www.kegg.jp/kegg-bin/show_pathway?hsa03022+hsa:51616+hsa:6872	35	2	1	0.065
KEGG	HEMATOPOIETIC_CELL_LINEAGE	4640	http://www.kegg.jp/kegg-bin/show_pathway?hsa04640+hsa:3655+hsa:3672+hsa:3678+hsa:3690+hsa:966	88	5	2	0.065
KEGG	SPHINGOLIPID_METABOLISM	600	http://www.kegg.jp/kegg-bin/show_pathway?hsa00600+hsa:81537+hsa:8613+hsa:9331	40	3	2	0.062
KEGG	GLYCINE_SERINE_AND_THREONINE_METABOLISM	260	http://www.kegg.jp/kegg-bin/show_pathway?hsa00260+hsa:6470+hsa:6472	32	2	2	0.058
PATHWAY_INTERACTION_DATABASE	IL8-_AND_CXCR2-MEDIATED_SIGNALING_EVENTS	200168	http://pid.nci.nih.gov/search/pathway_landing.shtml?what=graphic&jpg=on&pathway_id=200168	33	2	2	0.057
KEGG	GLYCOSPHINGOLIPID_BIOSYNTHESIS_LACTO_AND_NEOLACTO_SERIES	601	http://www.kegg.jp/kegg-bin/show_pathway?hsa00601+hsa:6487+hsa:8707	26	2	2	0.055
PATHWAY_INTERACTION_DATABASE	SYNDECAN-4-MEDIATED_SIGNALING_EVENTS	200135	http://pid.nci.nih.gov/search/pathway_landing.shtml?what=graphic&jpg=on&pathway_id=200135	31	2	2	0.054
PATHWAY_INTERACTION_DATABASE	PAR1-MEDIATED_THROMBIN_SIGNALING_EVENTS	200190	http://pid.nci.nih.gov/search/pathway_landing.shtml?what=graphic&jpg=on&pathway_id=200190	42	2	2	0.054
KEGG	OXIDATIVE_PHOSPHORYLATION	190	http://www.kegg.jp/kegg-bin/show_pathway?hsa00190+hsa:526	132	1	1	0.053
KEGG	TASTE_TRANSDUCTION	4742	http://www.kegg.jp/kegg-bin/show_pathway?hsa04742+hsa:112+hsa:5567	52	2	1	0.052
PATHWAY_INTERACTION_DATABASE	IL8-_AND_CXCR1-MEDIATED_SIGNALING_EVENTS	200200	http://pid.nci.nih.gov/search/pathway_landing.shtml?what=graphic&jpg=on&pathway_id=200200	27	2	2	0.052
KEGG	ALLOGRAFT_REJECTION	5330	http://www.kegg.jp/kegg-bin/show_pathway?hsa05330+hsa:356+hsa:940	37	2	2	0.05
KEGG	GRAFT-VERSUS-HOST_DISEASE	5332	http://www.kegg.jp/kegg-bin/show_pathway?hsa05332+hsa:356+hsa:940	41	2	2	0.049
KEGG	N-GLYCAN_BIOSYNTHESIS	510	http://www.kegg.jp/kegg-bin/show_pathway?hsa00510+hsa:2530+hsa:4124	49	2	2	0.049
KEGG	ABC_TRANSPORTERS	2010	http://www.kegg.jp/kegg-bin/show_pathway?hsa02010+hsa:64137	44	1	2	0.048
KEGG	AUTOIMMUNE_THYROID_DISEASE	5320	http://www.kegg.jp/kegg-bin/show_pathway?hsa05320+hsa:356+hsa:940	52	2	2	0.048
KEGG	TYPE_I_DIABETES_MELLITUS	4940	http://www.kegg.jp/kegg-bin/show_pathway?hsa04940+hsa:356+hsa:940	43	2	2	0.048
KEGG	GLYCEROLIPID_METABOLISM	561	http://www.kegg.jp/kegg-bin/show_pathway?hsa00561+hsa:56894+hsa:8613	49	2	2	0.048
KEGG	FATTY_ACID_METABOLISM	71	http://www.kegg.jp/kegg-bin/show_pathway?hsa00071+hsa:2182+hsa:51	43	2	2	0.046
PATHWAY_INTERACTION_DATABASE	CD40_CD40L_SIGNALING	200037	http://pid.nci.nih.gov/search/pathway_landing.shtml?what=graphic&jpg=on&pathway_id=200037	30	2	1	0.04
PATHWAY_INTERACTION_DATABASE	ALPHA-SYNUCLEIN_SIGNALING	200220	http://pid.nci.nih.gov/search/pathway_landing.shtml?what=graphic&jpg=on&pathway_id=200220	33	1	1	0.039
KEGG	NUCLEOTIDE_EXCISION_REPAIR	3420	http://www.kegg.jp/kegg-bin/show_pathway?hsa03420+hsa:5886	44	1	1	0.034
KEGG	VALINE_LEUCINE_AND_ISOLEUCINE_DEGRADATION	280	http://www.kegg.jp/kegg-bin/show_pathway?hsa00280+hsa:1629+hsa:587	44	2	1	0.032
PATHWAY_INTERACTION_DATABASE	ENDOGENOUS_TLR_SIGNALING	200209	http://pid.nci.nih.gov/search/pathway_landing.shtml?what=graphic&jpg=on&pathway_id=200209	25	1	1	0.031
PATHWAY_INTERACTION_DATABASE	EPHA_FORWARD_SIGNALING	200143	http://pid.nci.nih.gov/search/pathway_landing.shtml?what=graphic&jpg=on&pathway_id=200143	34	1	1	0.031
KEGG	AMINO_SUGAR_AND_NUCLEOTIDE_SUGAR_METABOLISM	520	http://www.kegg.jp/kegg-bin/show_pathway?hsa00520+hsa:7360+hsa:9945	47	2	1	0.031
KEGG	GLYCOSYLPHOSPHATIDYLINOSITOL(GPI)-ANCHOR_BIOSYNTHESIS	563	http://www.kegg.jp/kegg-bin/show_pathway?hsa00563+hsa:10026	25	1	1	0.031
KEGG	ANTIGEN_PROCESSING_AND_PRESENTATION	4612	http://www.kegg.jp/kegg-bin/show_pathway?hsa04612+hsa:1385	76	1	1	0.03
PATHWAY_INTERACTION_DATABASE	BETA2_INTEGRIN_CELL_SURFACE_INTERACTIONS	200139	http://pid.nci.nih.gov/search/pathway_landing.shtml?what=graphic&jpg=on&pathway_id=200139	29	1	1	0.029
PATHWAY_INTERACTION_DATABASE	IL23-MEDIATED_SIGNALING_EVENTS	200155	http://pid.nci.nih.gov/search/pathway_landing.shtml?what=graphic&jpg=on&pathway_id=200155	37	1	1	0.028
KEGG	TRYPTOPHAN_METABOLISM	380	http://www.kegg.jp/kegg-bin/show_pathway?hsa00380+hsa:8564	42	1	1	0.027
KEGG	INTESTINAL_IMMUNE_NETWORK_FOR_IGA_PRODUCTION	4672	http://www.kegg.jp/kegg-bin/show_pathway?hsa04672+hsa:940	48	1	1	0.025
KEGG	SYSTEMIC_LUPUS_ERYTHEMATOSUS	5322	http://www.kegg.jp/kegg-bin/show_pathway?hsa05322+hsa:940	136	1	1	0.024
KEGG	ARGININE_AND_PROLINE_METABOLISM	330	http://www.kegg.jp/kegg-bin/show_pathway?hsa00330+hsa:2744	54	1	1	0.024
KEGG	STARCH_AND_SUCROSE_METABOLISM	500	http://www.kegg.jp/kegg-bin/show_pathway?hsa00500+hsa:7360	53	1	1	0.024
KEGG	GLUTATHIONE_METABOLISM	480	http://www.kegg.jp/kegg-bin/show_pathway?hsa00480+hsa:3417	50	1	1	0.023
KEGG	NOD-LIKE_RECEPTOR_SIGNALING_PATHWAY	4621	http://www.kegg.jp/kegg-bin/show_pathway?hsa04621+hsa:331	62	1	1	0.023
KEGG	DRUG_METABOLISM_OTHER_ENZYMES	983	http://www.kegg.jp/kegg-bin/show_pathway?hsa00983+hsa:1806	52	1	1	0.023
KEGG	ASTHMA	5310	http://www.kegg.jp/kegg-bin/show_pathway?hsa05310+hsa:2206	30	1	1	0.022
KEGG	CYTOSOLIC_DNA-SENSING_PATHWAY	4623	http://www.kegg.jp/kegg-bin/show_pathway?hsa04623+hsa:29110	56	1	1	0.022
KEGG	CITRATE_CYCLE_(TCA_CYCLE)	20	http://www.kegg.jp/kegg-bin/show_pathway?hsa00020+hsa:3417	31	1	1	0.022
KEGG	GALACTOSE_METABOLISM	52	http://www.kegg.jp/kegg-bin/show_pathway?hsa00052+hsa:7360	26	1	1	0.022
KEGG	PYRIMIDINE_METABOLISM	240	http://www.kegg.jp/kegg-bin/show_pathway?hsa00240+hsa:1806	99	1	1	0.022
KEGG	COLLECTING_DUCT_ACID_SECRETION	4966	http://www.kegg.jp/kegg-bin/show_pathway?hsa04966+hsa:526	27	1	1	0.022
KEGG	STEROID_HORMONE_BIOSYNTHESIS	140	http://www.kegg.jp/kegg-bin/show_pathway?hsa00140+hsa:6718	56	1	1	0.022
KEGG	LEISHMANIASIS	5140	http://www.kegg.jp/kegg-bin/show_pathway?hsa05140+hsa:7042	72	1	1	0.022
KEGG	RETINOL_METABOLISM	830	http://www.kegg.jp/kegg-bin/show_pathway?hsa00830+hsa:9227	65	1	1	0.022
KEGG	PENTOSE_AND_GLUCURONATE_INTERCONVERSIONS	40	http://www.kegg.jp/kegg-bin/show_pathway?hsa00040+hsa:7360	31	1	1	0.022
KEGG	PRIMARY_IMMUNODEFICIENCY	5340	http://www.kegg.jp/kegg-bin/show_pathway?hsa05340+hsa:5896	35	1	1	0.021
